# Supplementary material for: Recurrence of axial spondyloarthritis among first-degree relatives in a prospective 35-year-follow-up family study
Source: HighWire-hosted journal article supplement (doi:10.1136/rmdopen-2022-002208), 2022-07-01
Supplement: rmdopen-2022-002208supp002_data_supplement.pdf [file rmdopen-2022-002208supp002_data_supplement.pdf]

Supplementary Table 1. Status at follow-up in 2018-19 of the 1178 participants of the 1985 Swiss AS Family Study and response rate

| Category                                                    | Number      |
|-------------------------------------------------------------|-------------|
| Known to be deceased (probands 123; FDR 39)                 | 162         |
| Agreed to participate (probands 125; FDR 360)               | 485         |
|                                                             | 647 (54.9%) |
| <i>Missings</i>                                             |             |
| Agreed to participate; questionnaire not returned           | 24          |
| Declined participation                                      | 23          |
| No reply on invitational letter <i>or</i> incorrect address | 232         |
| Current address unknown                                     | 169         |
| Living abroad, address unknown                              | 72          |
| Otherwise (address blocked; non-german speaking)            | 11          |
|                                                             | 531 (45.1%) |
| Total                                                       | 1178 (100%) |

Number of invitational letters sent: 791; response rate: 485/791 (61.3%)

Number participants follow-up study/participants baseline study: 485/1178 (41.6%)

## Supplementary Table 2.

## Lessons learned – Swiss AS Family study 1985- 2019

*Changes over time*

## People

Study participants marry, divorce, change names, move and die

Lesson: use national IDs for tracking purposes

## City &amp; villages administrations

Boundaries, community names and archives change

## Imaging technology changes over time

Physical pelvic radiographs outdated, new technologies (MRI) emerged

## Storage of data and forms

From mainframe computer to PC

Lesson: transfer data on time to actual standard storage technology

Paper copies fade away

Lesson: store data on more than one location. Make backups

## Motivation

People may forget having participated

Lesson: send periodically newsletter

Challenge: keep track of postal and email addresses

(Note: email not yet available in 1985)
